# Supplementary material for: Cytotoxic and molecular effects of soil extracts from the Agbogbloshie electronic-waste site on fish and human cell lines
Source: Royal Society of Chemistry journal article supplement (doi:10.1039/d4va00178h), 2024-01-01
Supplement: d4va00178h2.xlsx [file d4va00178h2.xlsx]

## Sheet: ST1 Matching site IDs
		Sample IDs this paper	Sample IDs chemical analysis paper https://doi.org/10.1016/j.scitotenv.2024.170219
E-waste surrounding sites	Upstream	30	19
		32	20
		34	21
		42	22
		44	23
		46	24
	Downstream	74	25
		88	26
	Community	48	27
		56	28
		58	29
E-waste	Trade	1	30
		3	31
		4	32
		6	33
		7	34
		8	35
		10	36
		11	37
	Dump	2	38
		5	39
		13	40
		14	41
		16	42
		18	43
		21	44
		23	45
		29	46
		39	47
		49	48
		55	49
		61	50
	Burn	17	51
		19	52
		20	53

## Sheet: ST2 Sequencing parameters
Trim Reads
Trim using quality scores	Yes
- Quality limit	0.05
Trim ambiguous nucleotides	Yes
- Maximum number of ambiguities	2
Automatic read-through adapter trimming	Yes
Trim homopolymers from 3'	PolyA, PolyG, PolyT
Discard short reads	Yes
Remove 16 bases from Read2 5' end (adapter)	Yes
RNA-Seq Analysis
Mismatch cost	2
Insertion cost	3
Deletion cost	3
Length fraction	0.8
Similarity fraction	0.8
Auto-detect paired distances	No
Maximum number of hits for a read	10
Strand specific	Reverse
Library type	3' sequencing
Ignore broken pairs	Yes
Expression value	Total counts

## Sheet: ST3 Metals, plastics concs
Site type	Site number	Cr (ug/g)	Cu (ug/g)	Zn (ug/g)	Cd (ug/g)	Pb (ug/g)	As (ug/g)	DEP (ug/g)	DBP (ug/g)	DiBP (ug/g)	BBzP (ug/g)	DHpP (ug/g)	DEHP (ug/g)	DEHA (ug/g)	BPA (ug/g)
Trade	Ghana soil 1	66.928	1400.05	925.8	2.06326	426.744	4.2885	N/D	0.484	0.456	0.165	8.21	44.9	N/D	11.7
Dump	Ghana soil 2	110.199	12112.3	3732.56	9.22898	789.384	12.3905	3.77	0.363	N/D	0.184	1.1	89.3	N/D	3.68
Trade	Ghana soil 3	171.374	2303.43	1138.79	2.84669	516.503	5.54315	N/D	1.5	1.06	0.557	6.48	110	0.0634	4.95
Trade	Ghana soil 4	92.6902	568.968	3796.3	5.85443	504.431	3.28788	0.957	1.61	3.21	0.322	0.688	8.15	0.0778	4.44
Dump	Ghana soil 5	46.7844	3924.3	981.834	2.51192	1034.73	5.1624	N/D	0.583	0.47	0.203	6.29	38.5	N/D	6.21
Trade	Ghana soil 6	69.8608	8361.21	10532.6	15.4022	2502.31	15.9798	1.82	0.296	0.434	0.136	5.52	112	0.156	4.91
Trade	Ghana soil 7	46.9497	3276.34	2272.97	4.73748	2086.15	3.86064	3.23	1.96	1.96	0.304	10.4	111	N/D	35.4
Trade	Ghana soil 8	79.2782	31672.2	4173.68	3.03918	2641.75	3.94945	N/D	2.67	5.04	0.193	8.26	96.4	0.0823	2.29
Trade	Ghana soil 10	53.386	6064.63	2082.96	6.20319	3396.29	5.62769	2.08	1.31	1.08	0.276	8.79	184	0.263	48.7
Trade	Ghana soil 11	42.5305	4173.57	1559.48	5.4804	4347.02	3.47896	N/D	0.752	0.501	0.0651	2.67	35.6	0.0715	14.7
Dump	Ghana soil 13	36.7659	191.803	585.224	0.672197	172.587	2.58206	0.999	N/D	N/D	0.0107	0.177	2.08	N/D	0.246
Dump	Ghana soil 14	31.7013	217.406	357.451	0.962313	148.125	2.21169	3.15	N/D	0.344	0.00652	0.0968	N/D	N/D	0.953
Dump	Ghana soil 16	19.9917	2475.07	1058.37	5.07727	426.815	2.81067	1.29	N/D	0.732	N/D	0.467	4.35	N/D	1.43
Burn	Ghana soil 17	25.4438	121.214	217.385	0.715142	67.6619	1.07631	5.56	N/D	N/D	0.0055	0.0619	3.05	N/D	0.0593
Dump	Ghana soil 18	132.002	92.478	266.783	1.59446	95.2203	26.6161	N/D	N/D	N/D	0.0339	0.366	N/D	N/D	2.31
Burn	Ghana soil 19	16.5266	20.0952	116.399	0.441476	19.9929	1.25533	N/D	N/D	N/D	0.0131	0.0224	N/D	N/D	0.0369
Burn	Ghana soil 20	30.3763	31.7111	494.708	0.180988	20.5886	1.55075	N/D	0.245	N/D	0.00587	0.227	4.76	N/D	N/D
Dump	Ghana soil 21	48.3375	149.026	886.255	0.786952	181.116	3.19426	N/D	N/D	0.183	0.00834	0.31	29.2	N/D	0.279
Dump	Ghana soil 23	76.3393	98.4107	821.121	1.53839	139.692	3.51652	0.885	N/D	N/D	N/D	0.238	4.45	N/D	0.0982
Dump	Ghana soil 29	35.2233	53.5487	311	0.540268	91.7075	2.57622	N/D	N/D	N/D	0.00307	0.118	N/D	N/D	N/D
Upstream	Ghana soil 30	141.637	818.777	1710.08	2.96822	606.935	6.31559	1.68	N/D	N/D	0.0267	0.32	7.28	N/D	4.6
Upstream	Ghana soil 32	29.0556	102.061	224.625	0.403525	115.423	3.08386	N/D	N/D	N/D	0.0155	0.397	4.09	N/D	0.0568
Upstream	Ghana soil 34	34.8665	696.212	287.06	0.211188	183.324	2.47099	1.29	N/D	N/D	0.0203	0.066	2.5	N/D	0.714
Dump	Ghana soil 39	21.6598	24.4555	115.283	0.15015	35.207	1.32303	3.64	N/D	N/D	N/D	0.166	N/D	N/D	N/D
Upstream	Ghana soil 42	34.5456	194.271	224.341	0.309711	84.7649	1.78162	0.932	0.264	0.328	0.0114	0.197	7.15	N/D	0.116
Upstream	Ghana soil 44	11.1638	513.641	234.551	0.0878049	125.001	2.41374	N/D	0.564	1.08	0.0558	0.609	9.26	N/D	0.596
Upstream	Ghana soil 46	82.7216	1210.85	4137.78	7.10195	926.929	15.8691	N/D	0.595	0.791	4.88	3.21	62.5	N/D	62.3
Community	Ghana soil 48	26.3571	889.085	225.445	0.378229	181.542	2.20245	0.829	0.275	N/D	0.0694	1.45	52.8	N/D	0.734
Dump	Ghana soil 49	27.1429	37.3309	201.08	0.30089	61.8156	1.70831	N/D	0.226	N/D	N/D	0.0416	N/D	N/D	N/D
Dump	Ghana soil 55	19.0243	43.0698	324.566	0.190773	54.4659	3.14125	N/D	N/D	N/D	N/D	0.0853	N/D	N/D	0.0771
Community	Ghana soil 56	30.1792	91.2375	337.311	0.44055	64.8648	3.41325	0.84	0.243	0.204	0.0246	N/D	31.6	N/D	0.158
Community	Ghana soil 58	16.1129	59.4474	107.808	0.154171	30.9544	0.832522	3.02	N/D	N/D	N/D	N/D	7.16	N/D	N/D
Dump	Ghana soil 61	55.6431	115.719	627.491	0.833498	261.449	4.23665	1.79	N/D	N/D	0.0104	0.356	1.4	N/D	0.0992
Downstream	Ghana soil 74	30.6421	75.4925	264.43	0.285224	95.3024	3.86687	N/D	N/D	N/D	0.00509	0.0234	N/D	N/D	N/D
Downstream	Ghana soil 88	15.0202	20.616	44.622	-0.0051	16.4103	0.97845	1.29	N/D	N/D	0.022	0.0401	N/D	N/D	N/D

## Sheet: ST4 QC for metal contaminants
Precision
Site #	Cr	Cu	Zn	Cd	Pb	As
14	0.082299	0.0560991	0.014728	0.351098	0.408031	0.0263022
37	0.0217699	0.0336025	0.0499216	0.031272	0.0441426	0.0244817
65	0.0213995	0.189283	0.0988014	-0.0834888	0.139795	0.075904
88	0.129419	0.463713	0.0662101	-0.567274	0.331454	0.186108
Accuracy
Sample 1	Cr	Cu	Zn	Cd	Pb	As
Ghana QC 98-4 R1	83.0317	73.087	1238.47	3.30164	213.198	14.8263
Ghana QC 98-4 R2	85.479	74.4195	1278.14	3.56193	219.152	14.824
Ghana QC 98-4 R3	88.4753	81.278	1321.06	3.52915	226.731	15.5448
MEAN	85.662	76.2615	1279.22	3.46424	219.694	15.065
STDEV	2.72642	4.39522	41.3045	0.141767	6.78292	0.415528
CV (precision)	0.0318277	0.0576335	0.0322887	0.0409231	0.0308744	0.0275823
ACTUAL CERTIFIED (SED98-04)	83.2	74.8	1370	3.52	228	15.58
% ERROR	0.0295915	0.019539	-0.0662606	-0.0158406	-0.0364301	-0.033053
Sample 2
Ghana QC 98-5 R1	98.8056	114.849	831.77	4.88578	179.572	7.35704
Ghana QC 98-5 R2	101.856	117.433	845.846	5.06189	182.26	7.73232
Ghana QC 98-5 R3	103.597	119.951	856.749	5.05429	187.762	7.53595
MEAN	101.42	117.411	844.788	5.00065	183.198	7.54177
STDEV	2.42546	2.55117	12.5229	0.0995584	4.17491	0.187709
CV (precision)	0.0239151	0.0217286	0.0148237	0.0199091	0.0227891	0.0248892
ACTUAL CERTIFIED (SED98-05)	105.5	115	927	5.58	188	7.86
% ERROR	-0.0386761	0.0209644	-0.0886861	-0.103826	-0.0255438	-0.0404875

## Sheet: ST5 External validation
Concentration (mg/kg)	Site Information	Cr	Cu	Zn	Cd	Pb	As	Reference
Measured Values	All sites (n=35)	66.4302	5237.82	1477.63	2.86864	769.228	4.48734	This study
	a.Burn (n=3)	24.1156	57.6736	276.164	0.445869	36.0812	1.29413
	b.Dump (n=13)	50.8319	1502.69	789.925	1.87601	268.639	5.49766
	c.Trade (n=8)	77.8746	7227.55	3310.32	5.70335	2052.65	5.752
	d.Upstream (n=6)	55.665	589.301	1136.41	1.84707	340.396	5.32248
	e.Downstream (n=2)	22.8312	48.0543	154.526	0.140062	55.8563	2.42266
	f.Community (n=3)	24.2164	346.59	223.521	0.324317	92.4536	2.14941
Literature Values	All sites	110	1500	2300	6.2	1100	-	Moeckel et al., 2020
	Burn	139	10400	7010	14	5080	8	Ackah, 2019
	Dismantling	60	1800	866	8	846	5	Ackah, 2019
	Burn	-	6590	-	11	4540	12	Cao et al., 2020
	Burn	182	15841	16065	65	6106	218	Dodd et al., 2023
	Dismantling	342	3239	1658	38	681	23	Dodd et al., 2023
Control Reference	Blank soil sample	0.0413437	0.834187	2.87662	0.0158062	0.31545	-0.112162	This study
Standard Values	EPA, Regional Screening Levels	0.3	310	2300	0.71	400	0.68	EPA, 2023
	-- % sites exceed EPA SSL	1	45.7143	14.2857	54.2857	37.1429	100
	CCME	0.4	63	250	1.4	70	12	CCME
	-- %site exceed CMME	100	80	71.4286	42.8571	77.1429	11.4286

## Sheet: ST6 Hazard index
HQ Metal	Cr(mg/kg)	Cu(mg/kg)	Zn(mg/kg)	Cd(mg/kg)	Pb(mg/kg)	As(mg/kg)	HI Metal		HQ Plastics	DEP(mg/kg)	DBP(mg/kg)	DiBP(mg/kg)	BBzP(mg/kg)	DEHP(mg/kg)	BPA(mg/kg)	HI Plastics		Total HI
RfD (mg/kg-day)	0.003	0.04	0.3	0.0001	0.0036	0.0003			RfD (mg/kg-day)	0.8	0.1	0.1	0.2	0.02	0.05
IRS rate (mg/d)	100	100	100	100	100	100			IRS rate (mg/d)	100	100	100	100	100	100
BW (kg)	80	80	80	80	80	80			BW (kg)	80	80	80	80	80	80
RBA	1	1	1	1	0.6	0.6			RBA	1	1	1	1	1	1
Ghana soil 2	0.0459161	0.378511	0.0155524	0.115362	0.164455	0.0309762	0.750773		Ghana soil 2	5.89063e-06	4.5375e-06	0	1.15e-06	0.00558125	9.2e-05	0.00568483		0.756458
Ghana soil 3	0.0714057	0.0719823	0.00474496	0.0355836	0.107605	0.0138579	0.305179		Ghana soil 3	0	1.875e-05	1.325e-05	3.48125e-06	0.006875	0.00012375	0.00703423		0.312213
Ghana soil 5	0.0194935	0.122634	0.00409097	0.031399	0.215568	0.012906	0.406092		Ghana soil 5	0	7.2875e-06	5.875e-06	1.26875e-06	0.00240625	0.00015525	0.00257593		0.408668
Ghana soil 7	0.0195624	0.102386	0.00947072	0.0592184	0.434615	0.00965161	0.634903		Ghana soil 7	5.04687e-06	2.45e-05	2.45e-05	1.9e-06	0.0069375	0.000885	0.00787845		0.642782
Ghana soil 8	0.0330326	0.989756	0.0173903	0.0379897	0.550364	0.00987363	1.63841		Ghana soil 8	0	3.3375e-05	6.3e-05	1.20625e-06	0.006025	5.725e-05	0.00617983		1.64459
Ghana soil 16	0.00832987	0.0773458	0.00440987	0.0634659	0.0889197	0.00702668	0.249498		Ghana soil 16	2.01562e-06	0	9.15e-06	0	0.000271875	3.575e-05	0.000318791		0.249817
Ghana soil 20	0.0126568	0.000990971	0.00206128	0.00226235	0.0042893	0.00387687	0.0261376		Ghana soil 20	0	3.0625e-06	0	3.66875e-08	0.0002975	0	0.000300599		0.0264382
Ghana soil 30	0.0590153	0.0255868	0.00712532	0.0371027	0.126445	0.015789	0.271064		Ghana soil 30	2.625e-06	0	0	1.66875e-07	0.000455	0.000115	0.000572792		0.271637
Ghana soil 48	0.0109821	0.0277839	0.000939353	0.00472786	0.0378212	0.00550612	0.0877605		Ghana soil 48	1.29531e-06	3.4375e-06	0	4.3375e-07	0.0033	1.835e-05	0.00332352		0.091084
Ghana soil 49	0.0113095	0.00116659	0.000837834	0.00376113	0.0128782	0.00427077	0.0342241		Ghana soil 49	0	2.825e-06	0	0	0	0	2.825e-06		0.0342269
Ghana soil 74	0.0127675	0.00235914	0.00110179	0.0035653	0.0198547	0.00966716	0.0493156		Ghana soil 74	0	0	0	3.18125e-08	0	0	3.18125e-08		0.0493156

## Sheet: ST7 Risk index
RQ Metal	Cr	Cu	Zn	Cd	Pb	As	RI		RQ Plastic	DEP	DBP	BBzP	DEHP	RI
Interim Sediment Quality Guidelines (mg/kg)	37.3	35.7	123	0.6	35	5.9			Sediment Cleanup Objective (mg/kg)	61	220	4.9	47
Ghana soil 2	2.95439	339.281	30.3461	15.3816	22.5538	2.10008	412.617		Ghana soil 2	0.0618033	0.00165	0.037551	1.9	2.001
Ghana soil 3	4.59447	64.522	9.25845	4.74448	14.7572	0.939517	98.8161		Ghana soil 3	0	0.00681818	0.113673	2.34043	2.46092
Ghana soil 5	1.25427	109.924	7.98239	4.18653	29.5636	0.874984	153.786		Ghana soil 5	0	0.00265	0.0414286	0.819149	0.863228
Ghana soil 7	1.25871	91.7743	18.4794	7.89579	59.6043	0.654346	179.667		Ghana soil 7	0.0529508	0.00890909	0.0620408	2.3617	2.4856
Ghana soil 8	2.12542	887.176	33.9323	5.06529	75.4785	0.669399	1004.45		Ghana soil 8	0	0.0121364	0.0393878	2.05106	2.10259
Ghana soil 16	0.53597	69.3296	8.60463	8.46212	12.1947	0.476385	99.6034		Ghana soil 16	0.0211475	0	0	0.0925532	0.113701
Ghana soil 20	0.814379	0.888265	4.02202	0.301647	0.588246	0.262839	6.87739		Ghana soil 20	0	0.00111364	0.00119796	0.101277	0.103588
Ghana soil 30	3.79723	22.9349	13.9031	4.94703	17.341	1.07044	63.9937		Ghana soil 30	0.027541	0	0.00544898	0.154894	0.187884
Ghana soil 48	0.706626	24.9043	1.83288	0.630382	5.1869	0.373296	33.6344		Ghana soil 48	0.0135902	0.00125	0.0141633	1.1234	1.15241
Ghana soil 49	0.727691	1.04568	1.6348	0.501484	1.76616	0.289544	5.96536		Ghana soil 49	0	0.00102727	0	0	0.00102727
Ghana soil 74	0.821504	2.11464	2.14984	0.475373	2.72293	0.655401	8.93968		Ghana soil 74	0	0	0.00103878	0	0.00103878

## Sheet: ST8 Cytotoxicity results
Cell line		Upstream						Downstream		Community			Burn Site			Dump Site													Trade Site (sort, dismantle)								Average DMSO	Stdev
		30	32	34	42	44	46	74	88	48	56	58	17	19	20	2	5	13	14	16	18	21	23	29	39	49	55	61	1	3	4	6	7	8	10	11
RTgill-W1	DMSO	100.318	97.848	98.8118	96.044	97.2294	100.785	101.101	101.384	103.117	96.6459	103.406	94.8619	102.1	99.1051	97.5938	95.549	90.1246	95.3038	98.6731	99.9169	100.572	100.885	102.146	97.1303	102.563	99.2824	109.853	99.1121	101.685	104.971	98.8696	99.1424	102.765	101.544	99.3625	99.7086	3.38176
	0.292969	94.7398	94.7511	90.5061	94.5619	95.4291	95.5421	96.621	94.8623	86.3786	90.8629	89.6684	88.6456	92.6104	95.5417	97.8613	97.1001	97.1156	95.0394	85.0942	95.1563	94.8587	93.186	87.1423	91.8617	93.3065	95.1594	92.6852	99.3697	91.42	95.1569	96.7014	103.174	74.1641	96.8634	95.2583
	0.585938	98.918	98.9505	93.2053	96.2242	104.075	96.0833	98.0712	95.9439	101.835	92.0285	93.8294	98.5188	96.8471	104.318	95.3801	97.5703	93.2168	100.003	82.6864	97.9234	100.808	97.8148	97.0066	92.24	95.1742	96.7846	93.6916	106.04	91.1704	102.31	104.803	100.007	44.8199	101.422	98.4001
	1.17188	101.151	95.2922	91.4992	93.9123	99.1316	97.3013	91.8015	91.9576	84.6791	93.4556	92.7695	100.492	93.4192	104.258	78.5676	79.7304	94.4551	105.117	70.828	85.7941	100.498	95.3302	92.8365	88.4359	92.2222	95.1828	91.5237	101.964	86.8614	99.2686	105.005	91.6667	7.55893	99.1367	100.053
	2.34375	96.4541	97.9513	94.1985	96.8821	103.733	100.707	92.2304	92.0481	45.8758	83.7579	95.7491	97.3075	92.8228	105.324	36.1516	51.3553	82.2048	106.627	47.9358	61.2958	104.216	96.623	90.6339	90.3287	93.5066	96.6135	90.6375	99.6248	47.5516	98.6826	104.487	69.8844	3.66637	95.7321	99.3881
	4.6875	88.6708	96.5432	89.0071	101.04	108.287	93.9701	91.9458	89.4648	16.1381	65.7478	86.7164	84.9986	87.5632	100.054	8.29199	11.6713	64.6978	106.324	34.7525	19.6207	95.8887	91.1722	78.4577	86.1514	91.7898	93.1223	88.4704	77.4228	4.65462	82.6627	78.5325	19.9958	2.4182	64.2657	91.7091
	9.375	52.4677	93.3789	84.3887	102.485	112.44	68.2684	93.8986	88.0455	6.85386	31.7868	79.4803	59.8511	86.0881	73.0794	5.17658	6.35158	31.4497	96.5464	10.9755	7.08215	72.2991	79.3748	65.2068	85.5261	95.4416	95.6227	70.3737	18.1679	2.17307	24.6325	29.5282	2.27666	2.57698	10.4657	53.022
	LC50	9.79	>9.38	>9.38	>9.38	>9.38	>9.38	>9.38	>9.38	2.276	6.353	>9.38	>9.38	>9.38	10.79	1.902	2.276	6.21	>9.38	2.272	2.735	>9.38	>9.38	>9.38	>9.38	>9.38	>9.38	>9.38	6.411	2.207	7.021	7.155	3.024	0.497	5.441	9.721
Caco-2	DMSO	85.8107	99.4048	114.784	85.3561	89.9136	97.2629	93.0969	95.1945	98.6964	97.2659	98.3041	104.43																								96.6267	7.69098
	0.07	97.4927	99.2827	99.3013	103.692	102.648	103.849	95.9957	102.608	103.733	94.6176	104.861	103.432	101.388	103.042	103.691	99.3418	97.7901	109.977	104.842	104.176	101.275	110.039	98.6557	97.2198	105.522	98.2305	103.993	104.63	100.46	97.5884	94.6339	93.6353	92.871	81.2724	99.6204
	0.14	90.4893	97.4789	82.9815	94.5758	94.5004	94.4923	86.1137	90.7085	105.058	81.0421	105.447	94.9207	98.7947	96.9368	101.206	92.2273	91.7976	105.449	99.1419	100.811	95.6429	100.81	93.4323	93.7329	99.3912	97.0416	100.742	100.574	92.5412	90.5978	83.8123	88.9007	88.1021	83.8457	99.6796
	0.292969	83.0382	92.9807	79.0428	86.3847	86.1221	90.7304	71.9419	80.2982	92.6406	74.0818	95.1732	91.4339	89.6654	92.1035	99.6496	90.0494	90.7111	96.3863	90.6353	88.8424	92.6497	94.4464	87.0545	84.2302	81.3343	84.9127	91.0626	99.3691	92.5656	88.8896	83.0408	82.8073	84.3187	79.5263	102.408
	0.585938	81.9909	88.0072	76.5355	82.9049	81.7658	89.0831	70.7975	83.3835	94.8811	67.8383	97.4391	85.3886	82.6605	88.0701	85.2835	88.6384	88.9429	95.0527	84.6163	81.4982	86.7856	95.846	88.1554	79.1213	86.6193	84.9983	85.6026	97.171	92.4065	80.1375	76.5701	77.2876	80.4698	79.2769	102.669
	1.17188	81.6339	80.1172	70.9449	76.5626	76.196	85.7474	71.2617	80.246	97.8483	71.5982	90.0216	87.1978	88.082	89.8777	84.2164	88.6898	87.5945	94.283	83.2973	83.3634	85.7703	95.8197	84.6722	76.8172	74.3585	81.7783	81.6818	95.166	95.6508	79.7691	75.1366	82.7126	83.029	81.3796	102.096
	2.34375	92.1527	88.1472	82.747	86.5251	85.1416	89.3274	74.7963	79.3098	93.6988	77.267	95.57	92.458	91.7028	98.9307	89.2091	97.8819	95.6722	99.9418	88.957	88.4777	89.5426	97.8481	91.4477	83.5129	78.1882	86.5022	81.2312	101.326	104.383	87.5125	85.8667	93.6845	86.0727	85.3058	104.001
	4.6875	88.6619	87.5013	81.0605	88.8126	88.6624	94.3828	81.5392	78.9944	82.3031	80.5951	97.3758	99.0913	95.0275	97.0271	96.6556	104.203	93.4462	98.4834	88.625	93.4661	92.8191	92.0797	84.6844	84.9724	73.1776	85.0673	86.7004	107.992	110.285	96.5463	92.9761	103.495	76.6106	93.9065	103.125
	9.375	104.363	96.1917	91.0956	98.7615	95.3458	106.387	75.9169	77.5251	67.5672	82.5821	86.1173	99.4676	105.15	101.801	104.738	107.68	94.4616	94.9849	101.413	100.134	99.6929	90.7521	97.8968	96.2458	64.5012	79.0538	82.8809	121.094	112.39	101.73	94.0729	103.967	37.5659	101.52	122.968
	LC50	>9.38	>9.38	>9.38	>9.38	>9.38	>9.38	>9.38	>9.38	>9.38	>9.38	>9.38	>9.38	>9.38	>9.38	>9.38	>9.38	>9.38	>9.38	>9.38	>9.38	>9.38	>9.38	>9.38	>9.38	>9.38	>9.38	>9.38	>9.38	>9.38	>9.38	>9.38	>9.38	5.6	>9.38	>9.38

## Sheet: ST9 QC for cytotoxicity test
Cell line	NoCellCtrl1	NoCellCtrl2	Average	Stdev	%CV
RTgill-W1	8195	8093	8144	72.1249	0.88562
RTgill-W1	6439	6779	6609	240.416	3.63771
RTgill-W1	7492	6540	7016	673.166	9.59472
RTgill-W1	6556	6524	6540	22.6274	0.345985
RTgill-W1	6055	5801	5928	179.605	3.02978
RTgill-W1	6426	6584	6505	111.723	1.71749
RTgill-W1	7350	7329	7339.5	14.8492	0.20232
RTgill-W1	6438	7163	6800.5	512.652	7.53845
RTgill-W1	8606	9122	8864	364.867	4.11628
RTgill-W1	8299	8547	8423	175.362	2.08195
RTgill-W1	8197	8286	8241.5	62.9325	0.763605
RTgill-W1	7384	7213	7298.5	120.915	1.65671
RTgill-W1	8561	8327	8444	165.463	1.95953
RTgill-W1	7095	7195	7145	70.7107	0.989653
RTgill-W1	7971	8537	8254	400.222	4.84883
RTgill-W1	7427	7168	7297.5	183.141	2.50964
RTgill-W1	8785	8439	8612	244.659	2.84091
RTgill-W1	8214	7611	7912.5	426.385	5.38876
RTgill-W1	9730	8502	9116	868.327	9.52531
RTgill-W1	10027	9351	9689	478.004	4.93347
RTgill-W1	7599	7391	7495	147.078	1.96235
RTgill-W1	7065	6883	6974	128.693	1.84533
RTgill-W1	6696	6690	6693	4.24264	0.0633892
RTgill-W1	6703	6725	6714	15.5563	0.2317
RTgill-W1	12157	11208	11682.5	671.044	5.74401
RTgill-W1	9822	9626	9724	138.593	1.42527
RTgill-W1	12423	12237	12330	131.522	1.06668
RTgill-W1	12972	12171	12571.5	566.393	4.50537
RTgill-W1	12598	12027	12312.5	403.758	3.27925
RTgill-W1	13895	14458	14176.5	398.101	2.80818
RTgill-W1	14410	14809	14609.5	282.136	1.93118
RTgill-W1	14861	13189	14025	1182.28	8.42982
RTgill-W1	9826	8654	9240	828.729	8.96893
RTgill-W1	11209	9366	10287.5	1303.2	12.6678
RTgill-W1	9319	8692	9005.5	443.356	4.92317
Caco-2	2533	2635	2584	72.1249	2.79121
Caco-2	2533	2772	2652.5	168.999	6.37129
Caco-2	2533	2637	2585	73.5391	2.84484
Caco-2	2533	2607	2570	52.3259	2.03603
Caco-2	2533	2639	2586	74.9533	2.89843
Caco-2	2533	2588	2560.5	38.8909	1.51888
Caco-2	2533	2843	2688	219.203	8.15488
Caco-2	2533	2614	2573.5	57.2756	2.22559
Caco-2	2533	2662	2597.5	91.2168	3.51171
Caco-2	2589	2688	2638.5	70.0036	2.65316
Caco-2	2589	2751	2670	114.551	4.29031
Caco-2	2589	2620	2604.5	21.9203	0.841632
Caco-2	2589	2713	2651	87.6812	3.30748
Caco-2	2589	2734	2661.5	102.53	3.85236
Caco-2	2589	2708	2648.5	84.1457	3.17711
Caco-2	2589	2755	2672	117.38	4.39295
Caco-2	2589	2771	2680	128.693	4.80199
Caco-2	2589	2711	2650	86.267	3.25536
Caco-2	2983	2900	2941.5	58.6899	1.99524
Caco-2	2983	3265	3124	199.404	6.38297
Caco-2	2983	3047	3015	45.2548	1.50099
Caco-2	2983	3076	3029.5	65.7609	2.17069
Caco-2	2983	2959	2971	16.9706	0.571207
Caco-2	2983	2975	2979	5.65685	0.189891
Caco-2	2983	3024	3003.5	28.9914	0.965253
Caco-2	2983	2990	2986.5	4.94975	0.165737
Caco-2	2983	3052	3017.5	48.7904	1.61691
Caco-2	2207	2178	2192.5	20.5061	0.935284
Caco-2	2207	2313	2260	74.9533	3.31652
Caco-2	2207	2136	2171.5	50.2046	2.31198
Caco-2	2207	2262	2234.5	38.8909	1.74047
Caco-2	2207	2219	2213	8.48528	0.383429
Caco-2	2207	2183	2195	16.9706	0.773146
Caco-2	2207	2229	2218	15.5563	0.701368
Caco-2	2207	2413	2310	145.664	6.3058

## Sheet: ST10 Mapping report
	RTgill-W1	Caco-2
# samples/pool	22-24	22-24
# reads/sample	0.5-14 million (*1 sample 17M; 2 samples 0.1-0.2M)	0.2 to 26 million (*1 sample 47M)
mapped in pairs %	50 to 78	76 to 99 (*1 sample at 60%)
ignored strand %	7 to 31	0.2 to 9
mapped to genes %	21 to 49	53 to 98 (*3 samples at 2-13%)
mapped to intron %	3 to 21	26 to 95 (*3 samples at 1-11%)
mapped to exon %	15 to 38	1 to 40 (*1 sample at 52%)
intergenic %	51 to 80	2 to 47 (3 samples at 86-97%)
rRNA %	71 to 97	0.1 to 7.8
protein coding %	2 to 28	44 to 78

[truncated: 2 more sheets: ST11 Overall number of DEGs, ST12 Functional analysis]
